# Supplementary material
Source: Elsevier journal article supplement (https://www.sciencedirect.com/science/article/pii/S1413355518303241)
Supplement: mmc1 [file S1413355518303241:mmc1.docx]

**Appendix 1**. Final version of the MCFQ.

| **QUESTIONÁRIO DE PERCEPÇÃO MATERNA DE FADIGA NO TRABALHO DE PARTO (QMFP)**  Instruções:  Esse questionário tem o objetivo de identificar sintomas de fadiga (cansaço) nesse momento tão especial que é o nascimento do seu filho (a). Para que a equipe de saúde possa lhe dar a assistência mais adequada, de acordo com as suas necessidades, é importante que você responda todas as perguntas e seja a mais sincera possível. Você terá o tempo que precisar para responder.  Eu vou ler cada pergunta e você deverá responder numa escala de 1 (um) a 5 (cinco) o quanto você está se sentindo em relação a cada estado que lhe for perguntado. Não existe resposta certa ou errada, apenas iremos graduar o quanto você percebe-se fadigada no seu trabalho de parto.  Escute atentamente cada pergunta e escolha o número que melhor se aproxima do modo como você está se sentindo nesse momento. | | | | | | |
| --- | --- | --- | --- | --- | --- | --- |
| 01 | Você está se sentindo cansada? | Nem um pouco | Um pouco | Mais ou menos | Muito | Extremamente |
| 1 | 2 | 3 | 4 | 5 |
| 02 | A dor está te impedindo de ajudar no trabalho de parto? | Nem um pouco | Um pouco | Mais ou menos | Muito | Extremamente |
| 1 | 2 | 3 | 4 | 5 |
| 03 | Você está com sono, com os olhos pesados? | Nem um pouco | Um pouco | Mais ou menos | Muito | Extremamente |
| 1 | 2 | 3 | 4 | 5 |
| 04 | Você está conseguindo descansar entre as contrações? | Nem um pouco | Um pouco | Mais ou menos | Muito | Extremamente |
| 1 | 2 | 3 | 4 | 5 |
| 05 | Você consegue realizar atividades como mudar de posição, caminhar, ficar de cócoras ou tomar banho? | Nem um pouco | Um pouco | Mais ou menos | Muito | Extremamente |
| 1 | 2 | 3 | 4 | 5 |
| 06 | Você está sentindo o corpo ou as pernas tremendo? | Nem um pouco | Um pouco | Mais ou menos | Muito | Extremamente |
| 1 | 2 | 3 | 4 | 5 |
| 07 | Você está com medo? | Nem um pouco | Um pouco | Mais ou menos | Muito | Extremamente |
| 1 | 2 | 3 | 4 | 5 |
| 08 | Você consegue prestar atenção no que as pessoas falam a sua volta? | Nem um pouco | Um pouco | Mais ou menos | Muito | Extremamente |
| 1 | 2 | 3 | 4 | 5 |
| 09 | Está difícil entender e seguir as orientações que você está recebendo? | Nem um pouco | Um pouco | Mais ou menos | Muito | Extremamente |
| 1 | 2 | 3 | 4 | 5 |
| 10 | Você está se sentindo sem energia? | Nem um pouco | Um pouco | Mais ou menos | Muito | Extremamente |
| 1 | 2 | 3 | 4 | 5 |
| 11 | Você está sentindo necessidade de descansar? | Nem um pouco | Um pouco | Mais ou menos | Muito | Extremamente |
| 1 | 2 | 3 | 4 | 5 |
| 12 | Você está se sentindo fraca? | Nem um pouco | Um pouco | Mais ou menos | Muito | Extremamente |
| 1 | 2 | 3 | 4 | 5 |
| 13 | Você acha que precisa de ajuda para parir? | Nem um pouco | Um pouco | Mais ou menos | Muito | Extremamente |
| 1 | 2 | 3 | 4 | 5 |
| 14 | Você está se sentindo angustiada? | Nem um pouco | Um pouco | Mais ou menos | Muito | Extremamente |
| 1 | 2 | 3 | 4 | 5 |
| 15 | Você está se sentindo desanimada, impaciente ou irritada? | Nem um pouco | Um pouco | Mais ou menos | Muito | Extremamente |
| 1 | 2 | 3 | 4 | 5 |
